# Supplementary material for: Assessment, management, and incidence of neonatal jaundice in healthy neonates cared for in primary care: a prospective cohort study
Source: PubMed Central journal article supplement (PMC9399078; doi:10.1038/s41598-022-17933-2), 2022-08-23
Supplement: 41598_2022_17933_MOESM1_ESM.pdf [file 41598_2022_17933_MOESM1_ESM.pdf]

**SUPPLEMENTARY FILES: ASSESSMENT, MANAGEMENT, AND INCIDENCE OF NEONATAL JAUNDICE  
IN HEALTHY NEONATES CARED FOR IN PRIMARY CARE: A PROSPECTIVE COHORT STUDY –  
SCIENTIFIC REPORTS**

Berthe A.M. van der Geest<sup>1,2</sup>, Malou J.S. de Mol<sup>1,2</sup>, Ivana S.A. Barendse<sup>1,2</sup>, Johanna P. de Graaf<sup>2</sup>, Loes C.M. Bertens<sup>2</sup>, Marten J. Poley<sup>3,4</sup>, Erwin Ista<sup>5,6</sup>, René F. Kornelisse<sup>1</sup>, Irwin K.M. Reiss<sup>1</sup>, Eric A.P. Steegers<sup>2</sup>, Jasper V. Been<sup>1,2,7\*</sup>. On behalf of the STARSHIP study group.

<sup>1</sup>Department of Paediatrics, Division of Neonatology, Erasmus MC Sophia Children's Hospital, University Medical Centre Rotterdam, Rotterdam, the Netherlands.

<sup>2</sup>Department of Obstetrics and Gynaecology, Division of Obstetrics and Foetal Medicine, Erasmus MC, University Medical Centre Rotterdam, Rotterdam, the Netherlands.

<sup>3</sup>Institute for Medical Technology Assessment (iMTA), Erasmus University Rotterdam, Rotterdam, the Netherlands.

<sup>4</sup>Intensive Care and Department of Paediatric Surgery, Erasmus MC – Sophia Children's Hospital, University Medical Centre Rotterdam, Rotterdam, the Netherlands.

<sup>5</sup>Department of Paediatrics, Intensive Care Unit, Erasmus MC – Sophia Children's Hospital, University Medical Centre Rotterdam, Rotterdam, the Netherlands.

<sup>6</sup>Department of Internal Medicine, Nursing Science, Erasmus MC, University Medical Centre Rotterdam, Rotterdam, the Netherlands

<sup>7</sup>Department of Public Health, Erasmus MC, University Medical Centre Rotterdam, Rotterdam, the Netherlands.

\*Corresponding author: Jasper V. Been, [j.been@erasmusmc.nl](mailto:j.been@erasmusmc.nl).

**SUPPLEMENTARY TABLE 1: START AND END DATES CONTROL PHASE STARSHIP TRIAL**

| PCBC                 | Start date control phase | End date control phase |
|----------------------|--------------------------|------------------------|
| Fam, Tilburg         | 21 November 2018         | 26 May 2019            |
| Haga, The Hague      | 3 August 2018            | 12 May 2019            |
| Isala, Zwolle        | 14 January 2019          | 8 March 2020           |
| Maastad, Rotterdam   | 13 September 2018        | 10 November 2019       |
| Noord, Rotterdam     | 5 November 2018          | 1 May 2019             |
| Sophia, Rotterdam    | 2 July 2018              | 14 April 2019          |
| Westeinde, The Hague | 23 January 2019          | 18 March 2019*         |

PCBC = primary care birth centre.

\*The planned end date of the control phase in PCBC Westeinde was 10 July 2019. However, as of 18 March 2019 this PCBC was permanently closed due to unforeseen circumstances.

**SUPPLEMENTARY TABLE 2: VARIABLES USED FOR ANALYSIS**

| Category                             | Variable                                                                                                                                                     |
|--------------------------------------|--------------------------------------------------------------------------------------------------------------------------------------------------------------|
| Maternal characteristics             | Gestational age (days)                                                                                                                                       |
|                                      | Maternal birth country                                                                                                                                       |
|                                      | Maternal Rhesus D factor                                                                                                                                     |
|                                      | Parity                                                                                                                                                       |
| Family characteristics               | Paternal birth country                                                                                                                                       |
|                                      | Siblings with history of neonatal hyperbilirubinaemia                                                                                                        |
| Delivery characteristics             | Mode of delivery (vaginal non-instrumental; vaginal, with vacuum; vaginal, with forceps C-section, non-instrumental; C-section, instrumental)                |
| Neonatal characteristics at baseline | Sex (male; female; indistinct)                                                                                                                               |
|                                      | Apgar score <5 after 5 minutes (no; yes; unknown)                                                                                                            |
|                                      | Arterial umbilical cord pH quantified (no; yes; unknown)                                                                                                     |
|                                      | Arterial umbilical cord pH <7.0 (no; yes; unknown)                                                                                                           |
|                                      | Birth weight (grams)                                                                                                                                         |
|                                      | Type of feeding (multiple answers possible: Breastfeeding on demand; Breastfeeding on schedule; Mother's milk via bottle or finger feeding; Formula feeding) |
| Daily measurements                   | Foetal Rhesus D factor (not determined; Rhesus D positive; Rhesus D negative; unknown)                                                                       |
|                                      | Skin colour (not yellow at all; slightly yellow; moderately yellow; quite yellow; very yellow)                                                               |
|                                      | Weight (grams)                                                                                                                                               |
|                                      | Risk factors for hyperbilirubinaemia (Blood group or Rhesus antagonism; Other haemolytic disorder; Asphyxia; Ill or drowsy neonate; Other, namely)           |
|                                      | TSB levels in $\mu\text{mol/L}$ with age of neonate in hours at measurement (if relevant)                                                                    |

|                                            |                                                                                                                                                                                                                                                                                                                             |
|--------------------------------------------|-----------------------------------------------------------------------------------------------------------------------------------------------------------------------------------------------------------------------------------------------------------------------------------------------------------------------------|
|                                            | Decisions made based on TSB (if relevant)                                                                                                                                                                                                                                                                                   |
|                                            | Admission to hospital (no; yes)                                                                                                                                                                                                                                                                                             |
| Parental questionnaire                     | Hospital admission after admission in PCBC (yes; no)                                                                                                                                                                                                                                                                        |
| Data requested from hospital (if relevant) | Duration of hospital admission in nights                                                                                                                                                                                                                                                                                    |
|                                            | Duration of phototherapy (in hours)                                                                                                                                                                                                                                                                                         |
|                                            | Exchange transfusion performed                                                                                                                                                                                                                                                                                              |
|                                            | Number of exchange transfusions performed                                                                                                                                                                                                                                                                                   |
|                                            | All laboratory quantifications during admission with age of neonate in hours at quantification                                                                                                                                                                                                                              |
|                                            | Blood group and Rhesus D factor neonate                                                                                                                                                                                                                                                                                     |
|                                            | Blood group and Rhesus D factor mother                                                                                                                                                                                                                                                                                      |
|                                            | Risk factors for neonatal hyperbilirubinaemia (as described in medical records)                                                                                                                                                                                                                                             |
| Variables composed for analysis            | Any degree of jaundice: neonate having any degree of jaundice as assessed by MCA (i.e., slightly yellow, moderately yellow, quite yellow, or very yellow) during admission in PCBC.                                                                                                                                         |
|                                            | Maximum degree of jaundice: maximum intensity of jaundice of neonate during admission in PCBC.                                                                                                                                                                                                                              |
|                                            | First postnatal day of visual jaundice during admission in PCBC: first day on which any degree of jaundice (i.e., slightly yellow, moderately yellow, quite yellow, or very yellow) was noted during admission in PCBC.                                                                                                     |
|                                            | Presence of perinatal asphyxia: Apgar score <5 at 5 minutes and/or umbilical cord pH <7.0*                                                                                                                                                                                                                                  |
|                                            | Exclusive breastfeeding: neonate was exclusively breastfed (i.e., no pumped mother's milk, no finger feeding).<br>Non-exclusive breastfeeding or formula feeding: neonate was fed with pumped mother's milk or formula feeding by bottle or finger feeding (sometimes in combination with being breastfed).                 |
|                                            | Western neonatal ethnicity: mother and father (if known) are born in a Western birth country.<br>Non-Western neonatal ethnicity: mother or father (if known) are born in a non-Western birth country.#                                                                                                                      |
|                                            | Age at discharge from the PCBC home or to the hospital: difference between discharge date and time and birth date and time in hours.<br><i>If discharge date missing: day after last measurements in PCBC was considered as discharge date,<br/>If discharge time was missing: 10.00h was considered as discharge time.</i> |

TSB = total serum bilirubin; PCBC = primary care birth centre; MCA = maternity care assistant.

\*As defined in the Dutch bilirubin nomogram.[1]

#According to the definition of Statistics the Netherlands.[2]

## REFERENCES

1. [Paediatric Association of the Netherlands] Nederlandse Vereniging voor Kindergeneeskunde (2008) [Bilirubin nomograms >35 weeks] Bilicurve >35 wkn. [Paediatric Association of the Netherlands] Nederlandse Vereniging voor Kindergeneeskunde.  
<http://babyzietgeel.nl/kinderarts/hulpmiddelen/diagnostiek/bilicurve35wkn.php>.]
2. [Statistics Netherlands] Centraal Bureau voor de Statistiek (2016) Person with a western migration background. [Statistics Netherlands] Centraal Bureau voor de Statistiek.  
<https://www.cbs.nl/en-gb/onze-diensten/methods/definitions/person-with-a-western-migration-background>. Accessed Jul 2021]

## **STARSHIP STUDY GROUP**

Martin G.A. Baartmans<sup>8</sup>, Jolita Bekhof<sup>9</sup>, Harry Buijs<sup>10,11</sup>, Jan Erik Bunt<sup>12</sup>, Peter H. Dijk<sup>13</sup>, Christian V. Hulzebos<sup>13</sup>, Ralph W.J. Leunissen<sup>14</sup>, Ben J.P.W. Snoeren<sup>15</sup>, Bente de Vries<sup>16</sup>, Leo Wewerinke<sup>17</sup>.

<sup>8</sup>Department of Paediatrics, Maasstad Hospital, Rotterdam, the Netherlands.

<sup>9</sup>Department of Paediatrics, Isala – Amalia Children's Clinic, Zwolle, the Netherlands.

<sup>10</sup>Primary care birth centre Haga, The Hague, the Netherlands.

<sup>11</sup>Primary care birth centre Maasstad, Rotterdam, the Netherlands.

<sup>12</sup>Department of Paediatrics, Elisabeth-TweeSteden Hospital, Tilburg, the Netherlands.

<sup>13</sup>Department of Neonatology, University Medical Centre Groningen – Beatrix Children's Hospital, University of Groningen, Groningen, the Netherlands.

<sup>14</sup>Department of Paediatrics, Haaglanden Medical Centre Westeinde, The Hague, the Netherlands.

<sup>15</sup>Primary care birth centre Fam, Tilburg, the Netherlands.

<sup>16</sup>Primary care birth centre Westeinde, The Hague, the Netherlands.

<sup>17</sup>Department of Paediatrics, Haga Hospital – Juliana Children's Hospital, The Hague, the Netherlands.
